# Supplementary material for: Coral cover a stronger driver of reef fish trophic biomass than fishing
Source: PubMed Central journal article supplement — Ecol Appl. 2020 Oct 3;31(1):e02224. doi: 10.1002/eap.2224 (PMC7816266; doi:10.1002/eap.2224), 2020-10-03
Supplement: EAP-31-e02224-s001.pdf [file EAP-31-e02224-s001.pdf]

**Supporting Information.** Russ, G.R., J.R. Rizzari, R.A. Abesamis and A.C. Alcala. 2020. Coral cover a stronger driver of reef fish trophic biomass than fishing. Ecological Applications.

**Appendix S1**

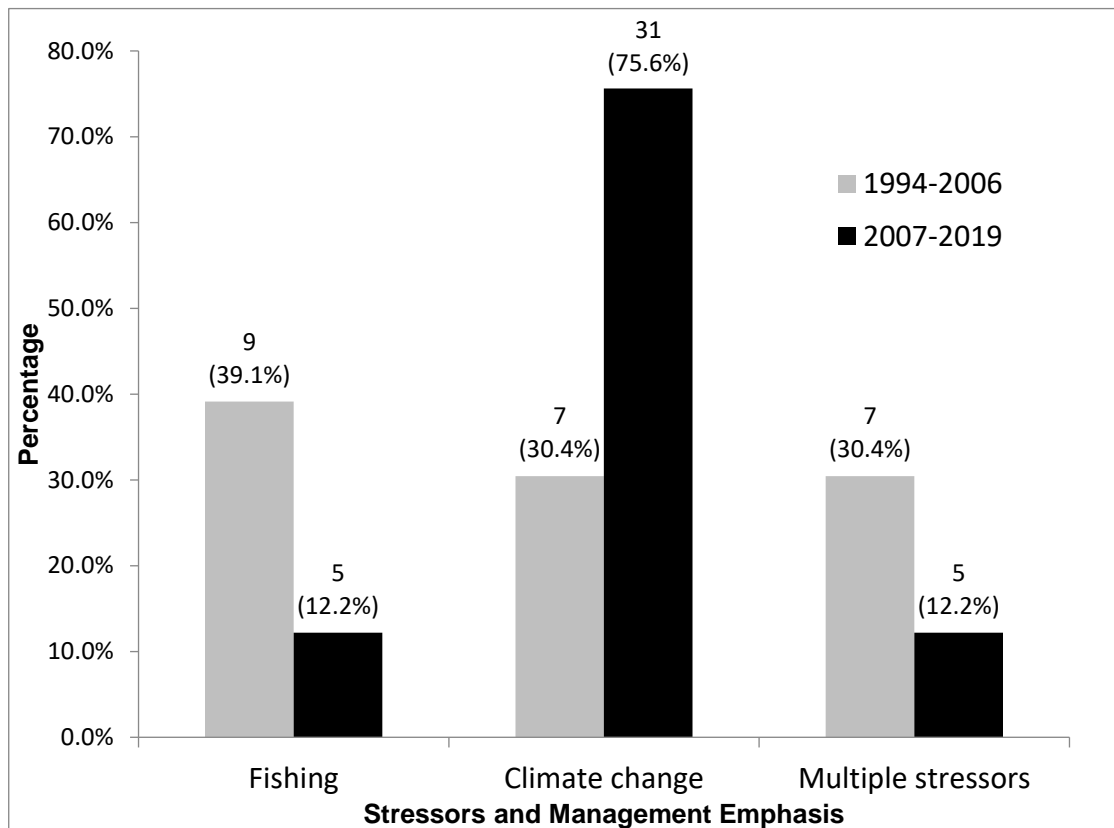

**Figure S1.** Results of a review of papers on stressors of "Coral Reefs" in Science and Nature, 1994-2019. Search Term "Coral Reefs". Number of papers = 64. A full list of the papers, and how they were categorised, is available on request from GRR. Science: Review, Reports, Viewpoint, Policy Forum, Insights/Perspectives (BUT NOT Letters or News) Nature: Letters, Review, Articles, Research (BUT NOT Correspondence, News & Views, Communications Arising).

|                     | 1974 | 1975 | 1976 | 1977 | 1978 | 1979 | 1980 | 1981 | 1982 | 1983 | 1984 | 1985 | 1986 | 1987 | 1988 | 1989 | 1990 | 1991 | 1992 | 1993 | 1994 |   |
|---------------------|------|------|------|------|------|------|------|------|------|------|------|------|------|------|------|------|------|------|------|------|------|---|
| Apo Reserve         |      |      |      |      |      |      |      |      |      |      |      |      |      |      |      |      |      |      |      |      |      |   |
| years sampled       |      |      |      |      |      |      |      |      |      | *    |      | *    |      |      | *    |      | *    | *    | *    | *    | *    | * |
| Apo Non-reserve     |      |      |      |      |      |      |      |      |      |      |      |      |      |      |      |      |      |      |      |      |      |   |
| years sampled       |      |      |      |      |      |      |      |      |      | *    |      | *    |      |      | *    |      | *    | *    | *    | *    | *    | * |
| Sumilon Reserve     |      |      |      |      |      |      |      |      |      |      |      |      |      |      |      |      |      |      |      |      |      |   |
| years sampled       |      |      |      |      |      |      |      |      |      | *    |      | *    |      |      | *    |      | *    | *    | *    | *    | *    | * |
| Sumilon Non-reserve |      |      |      |      |      |      |      |      |      |      |      |      |      |      |      |      |      |      |      |      |      |   |
| years sampled       |      |      |      |      |      |      |      |      |      | *    |      | *    |      |      | *    |      | *    | *    | *    | *    | *    | * |

| 1995 | 1996 | 1997 | 1998 | 1999 | 2000 | 2001 | 2002 | 2003 | 2004 | 2005 | 2006 | 2007 | 2008 | 2009 | 2010 | 2011 | 2012 | 2013 | 2014 |   |
|------|------|------|------|------|------|------|------|------|------|------|------|------|------|------|------|------|------|------|------|---|
|      |      |      |      |      |      |      |      |      |      |      |      |      |      |      |      |      |      |      |      |   |
| *    |      | *    | *    | *    | *    | *    |      | *    | *    | *    | *    | *    | *    | *    | *    | *    | *    | *    | *    | * |
|      |      |      |      |      |      |      |      |      |      |      |      |      |      |      |      |      |      |      |      |   |
| *    |      | *    | *    | *    | *    | *    |      | *    | *    | *    | *    | *    | *    | *    | *    | *    | *    | *    | *    | * |
|      |      |      |      |      |      |      |      |      |      |      |      |      |      |      |      |      |      |      |      |   |
| *    |      | *    | *    | *    | *    | *    |      | *    | *    | *    | *    | *    | *    | *    | *    | *    | *    | *    | *    | * |
|      |      |      |      |      |      |      |      |      |      |      |      |      |      |      |      |      |      |      |      |   |
| *    |      | *    | *    | *    | *    | *    |      | *    | *    | *    | *    | *    | *    | *    | *    | *    | *    | *    | *    | * |

**Figure S2.** Protection history of study sites, 1974 – 2014. White bars = years that sites were open to all fishing, grey bars = years when sites were open to only hook and line fishing, and black bars = years when sites were closed to fishing. Asterisks = years of sampling.

**Table S1.** Coral reef fish species within trophic groups.

| Trophic group/species             | Trophic group/species                | Trophic group/species         | Trophic group/species         | Trophic group/species            |
|-----------------------------------|--------------------------------------|-------------------------------|-------------------------------|----------------------------------|
| <b>Generalist large predators</b> | <b>Large benthic foragers</b>        | <b>Detritivores</b>           | <b>Small benthic foragers</b> | <b>Large planktivores</b>        |
| <i>Lethrinus atkinsoni</i>        | <i>Cheilinus diagramma</i>           | <i>Acanthurus blochi</i>      | <i>Chaetodon adiergastos</i>  | <i>Acanthurus mata</i>           |
| <i>L. erythracanthus</i>          | <i>C. fasciatus</i>                  | <i>A. dussumieri</i>          | <i>C. auriga</i>              | <i>A. thomsoni</i>               |
| <i>L. erythropterus</i>           | <i>C. trilobatus</i>                 | <i>A. xanthopterus</i>        | <i>C. ephippium</i>           | <i>Aphareus furcatus</i>         |
| <i>L. harak</i>                   | <i>Choerodon anchorago</i>           | <i>Ctenochaetus binotatus</i> | <i>C. kleini</i>              | <i>Caesio caeruleaurea</i>       |
| <i>L. lentjan</i>                 | <i>Hemigymnus fasciatus</i>          | <i>C. striatus/strigosus</i>  | <i>C. lineolatus</i>          | <i>C. cuning</i>                 |
| <i>L. microdon</i>                | <i>H. melapterus</i>                 | <i>C. tominiensis</i>         | <i>C. lunula</i>              | <i>C. lunaris</i>                |
| <i>L. obsoletus</i>               | <i>Lutjanus biguttatus</i>           | <b>Excavators</b>             | <i>C. melannotus</i>          | <i>C. teres</i>                  |
| <i>L. olivaceus</i>               | <i>L. fulviflamma</i>                | <i>Cetoscarus bicolor</i>     | <i>C. mertensii</i>           | <i>Hemitaurichthys polylepis</i> |
| <i>L. ornatus</i>                 | <i>Mulloides flavolineatus</i>       | <i>Hipposcarus longiceps</i>  | <i>C. ocellicaudus</i>        | <i>Naso brevirostris</i>         |
| <i>L. spp</i>                     | <i>Parupeneus barberinus</i>         | <i>Chlorurus bleekeri</i>     | <i>C. octofasciatus</i>       | <i>N. minor</i>                  |
| <i>Lutjanus argentimaculatus</i>  | <i>P. barberinoides</i>              | <i>C. bowersi</i>             | <i>C. punctatofasciatus</i>   | <i>N. thynnoides</i>             |
| <i>L. bohar</i>                   | <i>P. bifasciatus/crassilabris</i>   | <i>C. gibbus/microrhinos</i>  | <i>C. rafflesi</i>            | <i>N. vlamingii</i>              |
| <i>L. decussatus</i>              | <i>P. ciliatus</i>                   | <i>C. sordidus/spilurus</i>   | <i>C. semeion</i>             | <i>Pterocaesio diagramma</i>     |
| <i>L. fulvus</i>                  | <i>P. cyclostomus</i>                | <b>Scrapers</b>               | <i>C. speculum</i>            | <i>P. pisang</i>                 |
| <i>L. gibbus</i>                  | <i>P. multifasciatus/trilineata</i>  | <i>Scarus altipinnis</i>      | <i>C. ulietensis</i>          | <i>P. randalli</i>               |
| <i>L. monostigma</i>              | <i>P. vanicolensis</i>               | <i>S. chameleon</i>           | <i>C. unimaculatus</i>        | <i>P. tessellata</i>             |
| <i>L. rivulatus</i>               | <i>Plectorhinchus chaetodonoides</i> | <i>S. dimidiatus</i>          | <i>C. vagabundus</i>          | <i>P. tile</i>                   |
| <i>L. russelli</i>                | <i>P. gaterinoides/lineatus</i>      | <i>S. forsteni</i>            | <i>C. xanthurus</i>           | <b>Small planktivores</b>        |
| <i>Macolor niger</i>              |                                      | <i>S. frenatus</i>            | <i>Forcipiger flavissimus</i> | <i>Abudefduf vaigiensis</i>      |
| <i>Monotaxis grandoculis</i>      | <i>P. lessoni</i>                    | <i>S. ghobban</i>             | <i>Gomphosus varius</i>       | <i>Amblyglyphidodon aureus</i>   |
| <b>Piscivores</b>                 | <i>P. orientalis</i>                 | <i>S. globiceps</i>           | <i>Scolopsis bilineatus</i>   | <i>A. curacao</i>                |
| <i>Anyperodon leucogrammicus</i>  | <i>P. picus</i>                      | <i>S. lunula</i>              | <i>S. lineatus</i>            | <i>A. leucogaster</i>            |

|                                      |                             |                               |                                |                              |
|--------------------------------------|-----------------------------|-------------------------------|--------------------------------|------------------------------|
| <i>Aetheloperca rogae</i>            | <i>P. polytaenia</i>        | <i>S. niger</i>               | <i>Thalassoma hardwickii</i>   | <i>Chromis amboinensis</i>   |
| <i>Carangid spp.</i>                 | <i>P. spp.</i>              | <i>S. oviceps</i>             | <i>T. lunare</i>               | <i>C. retrofasciata</i>      |
| <i>Cephalopholis argus</i>           | <b>Croppers</b>             | <i>S. prasiognathus</i>       | <i>Zanclus cornutus</i>        | <i>C. ternatensis</i>        |
| <i>C. boenack</i>                    | <i>Acanthurus japonicus</i> | <i>S. rivulatus</i>           | <b>Obligate corallivores</b>   | <i>C. viridis</i>            |
| <i>C. cyanostigma</i>                | <i>A. nigrofuscus</i>       | <i>S. spinidens</i>           | <i>Chaetodon baronessa</i>     | <i>C. weberi</i>             |
| <i>C. leopardus</i>                  | <i>A. nigricans</i>         | <i>S. tricolor</i>            | <i>C. bennetti</i>             | <i>Chrysiptera talboti</i>   |
| <i>C. microprion</i>                 | <i>Naso annulatus</i>       | <i>S. rubroviolaceus</i>      | <i>C. ornatissimus</i>         | <i>Cirrhilabrus spp.</i>     |
| <i>C. miniatus</i>                   | <i>N. brachycentron</i>     | <b>Sandfeeders</b>            | <i>C. trifascialis</i>         | <i>Dascyllus aruanus</i>     |
| <i>C. sexmaculatus</i>               | <i>N. lituratus</i>         | <i>Acanthurs leucocheilus</i> | <i>C. trifasciatus</i>         | <i>D. reticulatus</i>        |
| <i>C. spp</i>                        | <i>N. tuberosus</i>         | <i>A. nigricauda</i>          | <b>Omnivorous pomacentrids</b> | <i>D. trimaculatus</i>       |
| <i>C. urodeta</i>                    | <i>N. unicornis</i>         | <i>A. olivaceus</i>           | <i>Pomacentrus amboinensis</i> | <i>Pomacentrus coelestis</i> |
| <i>Epinephelus caeruleopunctatus</i> | <i>Siganus argenteus</i>    | <i>A. pyroferus</i>           | <i>P. brachialis</i>           | <i>P. lepidogenys</i>        |
| <i>E. fasciatus</i>                  | <i>S. canaliculatus</i>     | <i>Scarus flavipectoralis</i> | <i>P. moluccensis</i>          | <i>Pseudanthias huchtii</i>  |
| <i>E. fuscoguttatus</i>              | <i>S. corallinus</i>        | <i>S. psittacus</i>           |                                | <i>P. squammipinnis</i>      |
| <i>E. malabaricus</i>                | <i>S. doliatus</i>          | <i>S. quoyi</i>               |                                | <i>P. tuka</i>               |
| <i>E. merra</i>                      | <i>S. guttatus</i>          | <i>S. schlegeli</i>           |                                |                              |
| <i>E. ongi</i>                       | <i>S. puellus</i>           |                               |                                |                              |
| <i>E. polyphekadion</i>              | <i>S. punctatus</i>         |                               |                                |                              |
| <i>E. spp</i>                        | <i>S. punctatissimus</i>    |                               |                                |                              |
| <i>Plectropomus areolatus</i>        | <i>S. spinus</i>            |                               |                                |                              |
| <i>P. laevis</i>                     | <i>S. unimaculatus</i>      |                               |                                |                              |
| <i>P. oligocanthus</i>               | <i>S. virgatus</i>          |                               |                                |                              |
| <i>Variola albimarginata</i>         | <i>S. vulpinus</i>          |                               |                                |                              |
| <i>V. louti</i>                      | <i>Zebrasoma scopas</i>     |                               |                                |                              |
|                                      | <i>Z. veliferum</i>         |                               |                                |                              |

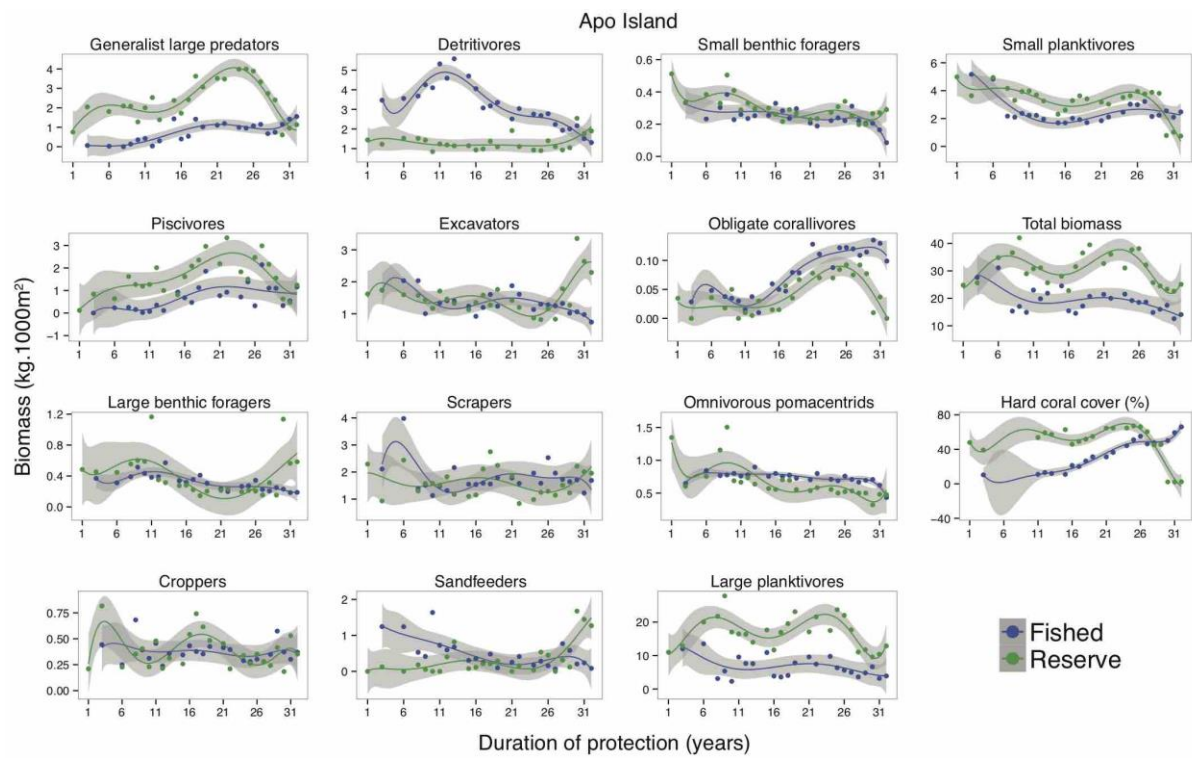

**Figure S3.** Long-term (1983-2014) temporal trends in biomass of different trophic groups, total fish biomass, and hard coral cover versus years of protection by no-take marine reserve (NTMR) status at Apo Island. Data points are means, trend lines are sixth order polynomials, and shading represents 95% confidence intervals. NTMR site is shown in green and fished site in blue. Note that the y-axis for hard coral is percent cover, not biomass. Note y-axis ranges differ among panels.

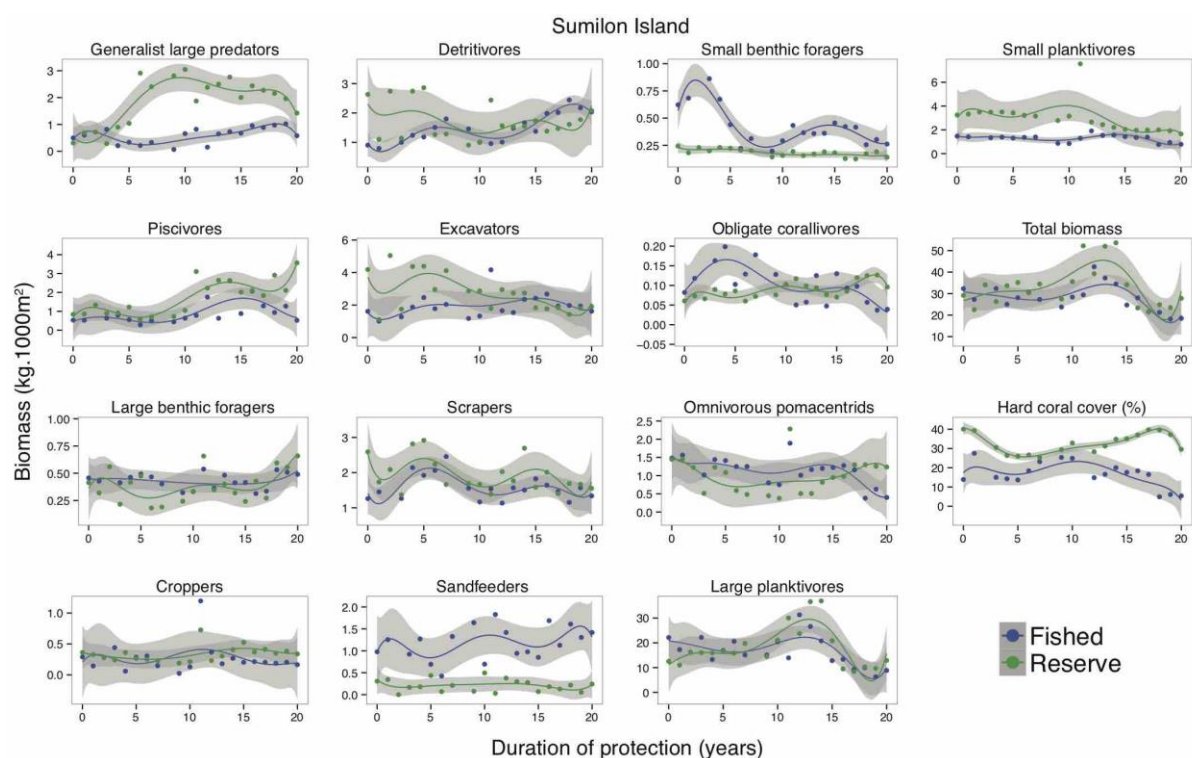

**Figure S4.** Long-term (1983-2014) temporal trends in biomass of different trophic groups, total fish biomass, and hard coral cover versus years of protection by no-take marine reserve (NTMR) status at Sumilon Island. Data points are means, trend lines are sixth order polynomials, and shading represents 95% confidence intervals. NTMR site shown in green and fished site in blue. Note that the y-axis for hard coral is percent cover, not biomass. Note y-axis ranges differ among panels.

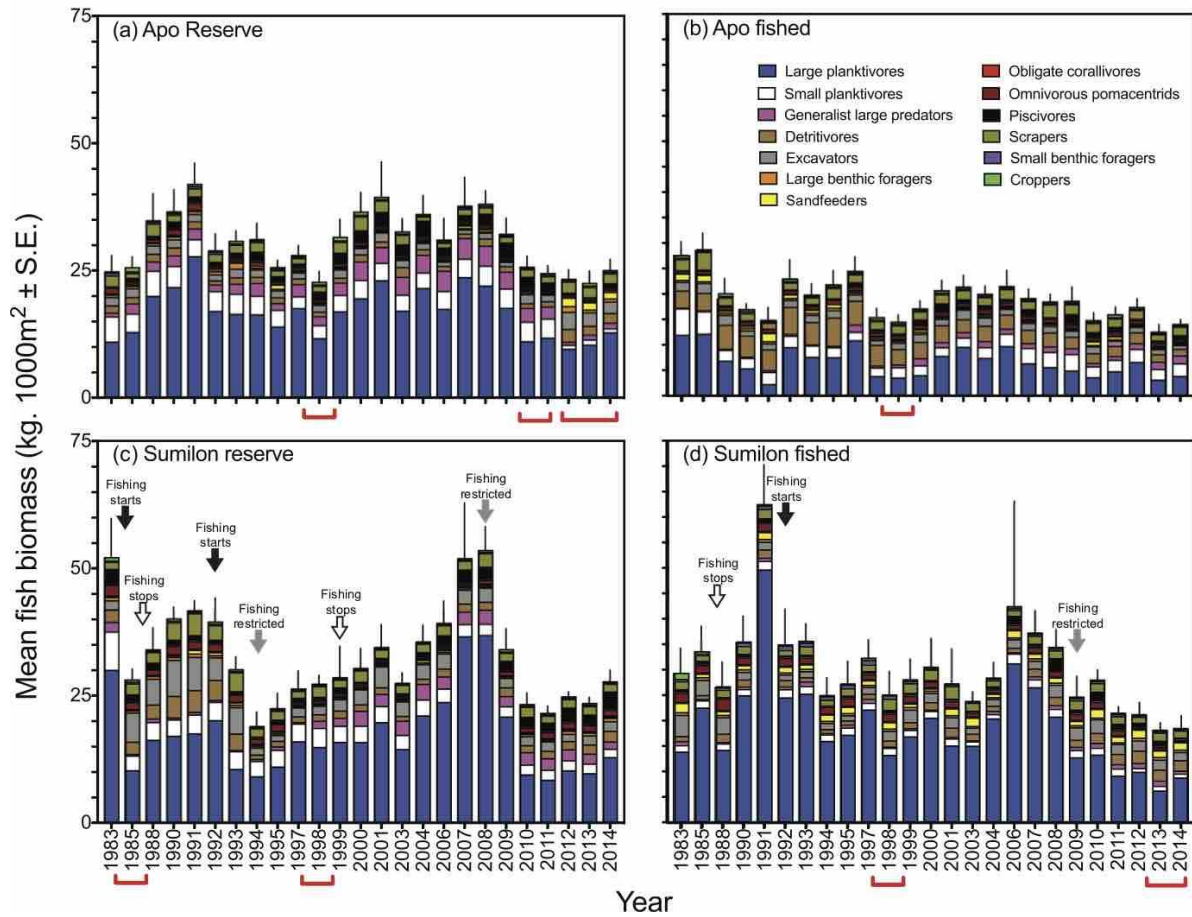

**Figure S5.** Long-term (1983-2014) temporal trends in mean biomass ( $\pm$  SE) of coral reef trophic groups at four sites. (a) Apo reserve – environmental disturbances (red brackets) from left to right are coral bleaching, local storm and back-to-back typhoons. (b) Apo fished – environmental disturbance (red brackets) is coral bleaching. (c) Sumilon reserve – environmental disturbances (red brackets) from left to right are destructive fishing, and crown-of-thorns and coral bleaching. Arrows indicate when fishing starts, stops or is restricted (= line fishing allowed). (d) Sumilon fished – environmental disturbances (red brackets) from left to right are coral bleaching and typhoon. Arrows indicate when fishing starts, stops or is restricted (= line fishing allowed).



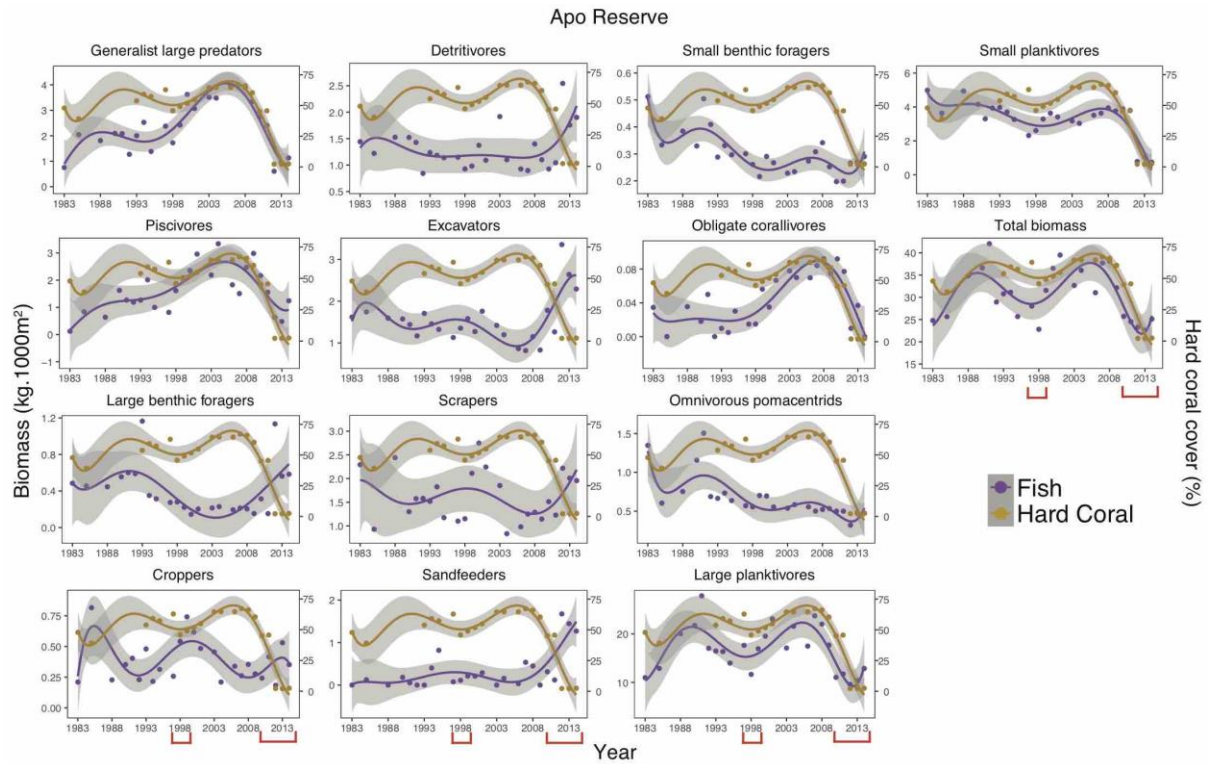

**Figure S6.** Long-term (1983-2014) temporal trends in biomass (left y-axis) of different trophic groups, and hard coral cover (right y-axis) at Apo Reserve. Data points are means, trend lines are sixth order polynomials, and shading represents 95% confidence intervals. Fish biomass is purple and hard coral is brown. Note y-axis ranges differ among panels. Environmental disturbances (red brackets) from left to right are coral bleaching (1998), local storm (2010) and back-to-back typhoons (2011-2012).



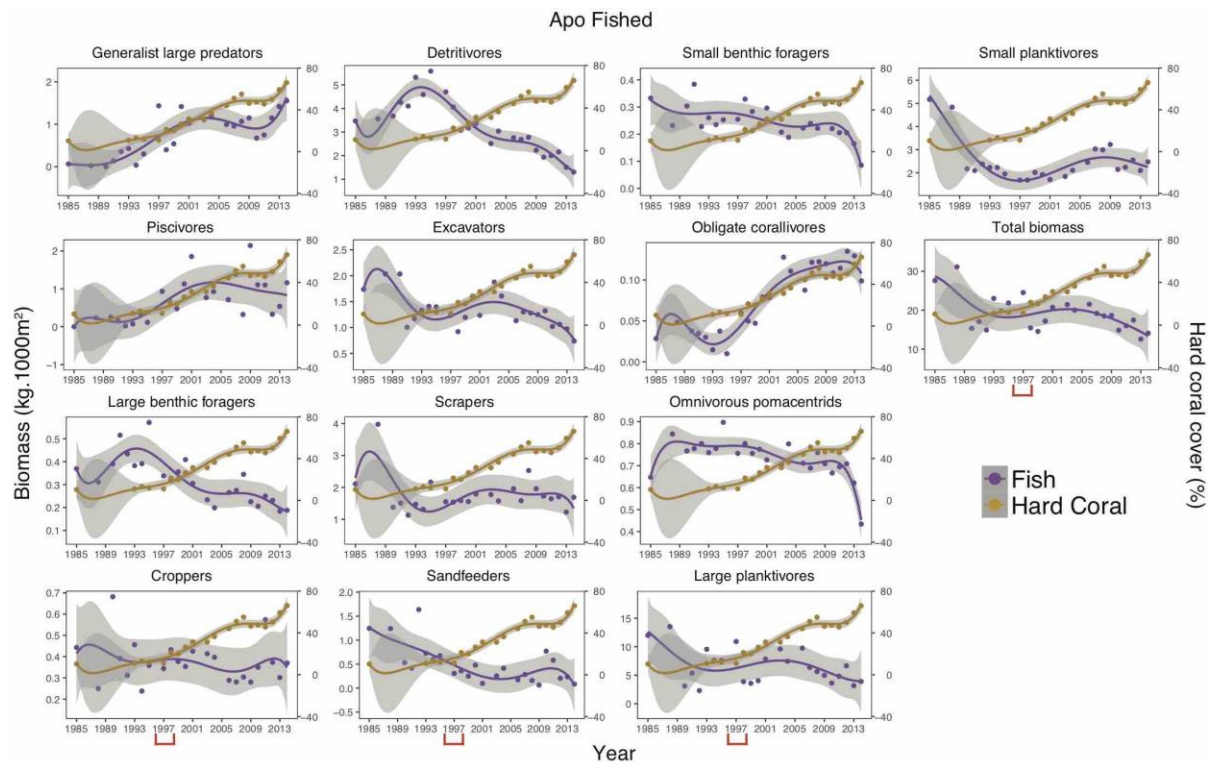

**Figure S7.** Long-term (1983-2014) temporal trends in biomass (left y-axis) of different trophic groups, and hard coral cover (right y-axis) at Apo fished site. Data points are means, trend lines are sixth order polynomials, and shading represents 95% confidence intervals. Fish biomass is purple and hard coral is brown. Note y-axis ranges differ among panels. Environmental disturbance (red brackets) is coral bleaching (1998).

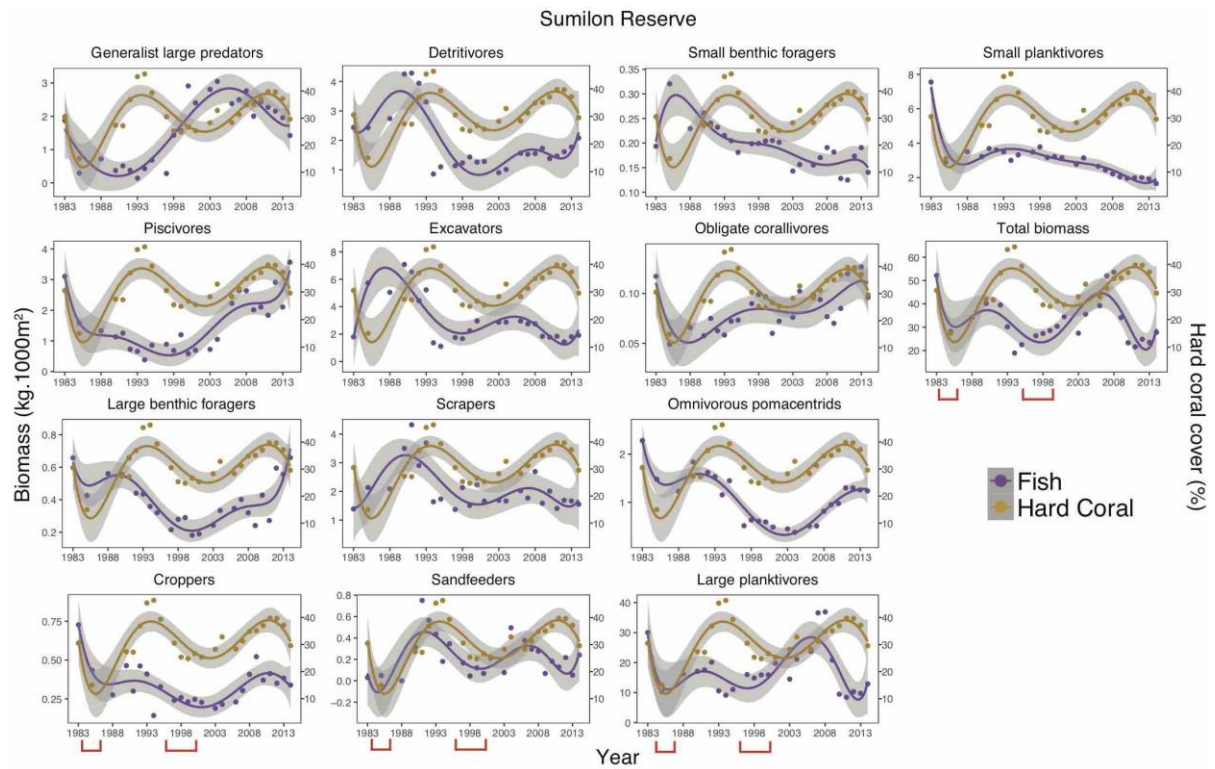

**Figure S8.** Long-term (1983-2014) temporal trends in biomass (left y-axis) of different trophic groups, and hard coral cover (right y-axis) at Sumilon Reserve. Data points are means, trend lines are sixth order polynomials, and shading represents 95% confidence intervals. Fish biomass is purple and hard coral is brown. Note y-axis ranges differ among panels. Environmental disturbances (red brackets) from left to right are destructive fishing (1984), and crown-of-thorns and coral bleaching (1998).

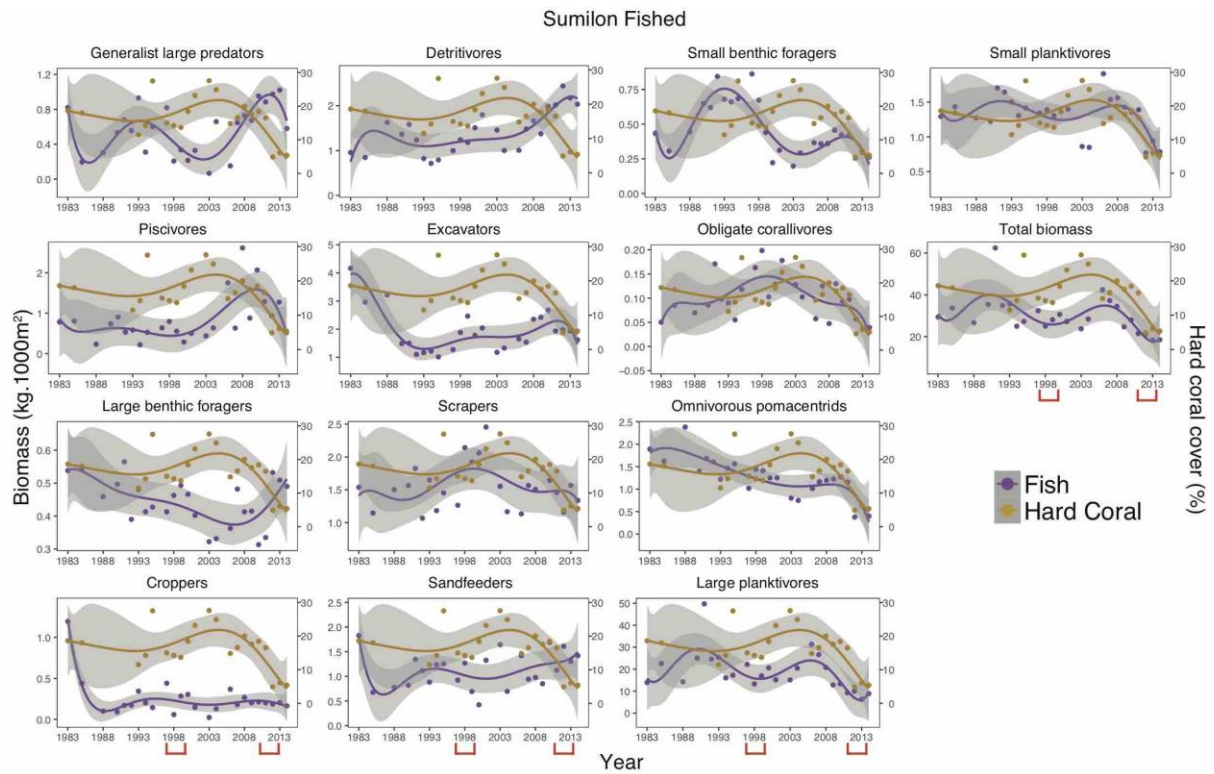

**Figure S9.** Long-term (1983-2014) temporal trends in biomass (left y-axis) of different trophic groups, and hard coral cover (right y-axis) at Sumilon fished site. Data points are means, trend lines are sixth order polynomials, and shading represents 95% confidence intervals. Fish biomass is purple and hard coral is brown. Note y-axis ranges differ among panels. Environmental disturbances (red brackets) from left to right are coral bleaching (1998) and typhoon (2012).
